# Supplementary material for: A universal value of effective annealing time for rapid oxide nucleation and growth under pulsed ultraviolet laser irradiation
Source: Royal Society of Chemistry journal article supplement (doi:10.1039/c3cp52224e), 2013-01-01
Supplement: c3cp52224e.pdf [file c3cp52224e.pdf]

## Electronic Supplementary Information

# Universal value of effective annealing time for rapid oxide nucleation and growth under pulsed ultraviolet laser

Tomohiko Nakajima,\* Kentaro Shinoda and Tetsuo Tsuchiya

Advanced Manufacturing Research Institute, National Institute of Advanced Industrial Science and Technology, Tsukuba Central 5, 1-1-1 Higashi, Tsukuba, Ibaraki, Japan. Tel: +81-29-861-6368; E-mail: t-nakajima@aist.go.jp

Time-resolved resistance measurements for the ITO thin films at each KrF laser pulse were conducted with a digital phosphor oscilloscope (DPO3054, Tektronix). The current at 1 mA was applied to the circuit, and the voltage variations were probed by the oscilloscope. The measurement timing of the resistance curves was synchronized with the KrF laser pulse probed by a photodetector (FPS-10, Ophir Optonics) from split laser beam. At the same time, the pulse shape of the lasers was monitored with the oscilloscope from the photodetector signal.

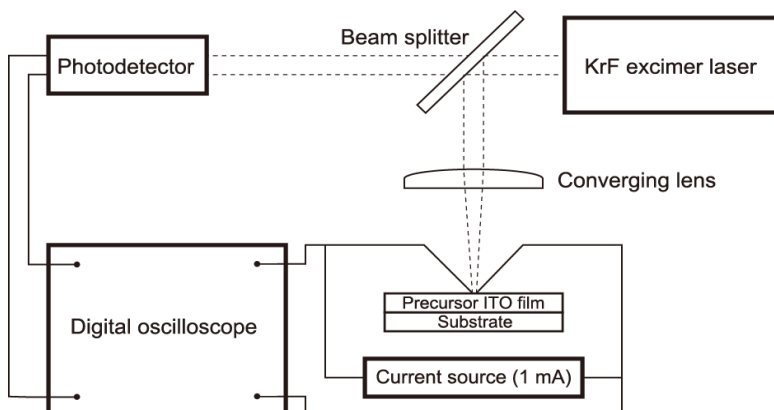

**Figure S1.** Schematic measurement system for the time-resolved resistance and laser pulse shape..

The ITO thin film obtained by the ELAMOD process showed a semiconducting behaviour, and it was fitted well by using variable range hopping (VRH) model ( $\sigma = A \exp[-(T_0/T)^{1/4}]$ ) above 160 K (Fig. S2(a)). The resistivity reduction at 800 °C compared to the value at room temperature (20 °C) was evaluated to be –33% from the extrapolated VRH fitting curve (Fig. S2(b)). This reduction is comparable with the resistivity drop during pulsed laser instantaneous heating at 10,000th pulse (Fig. 8).

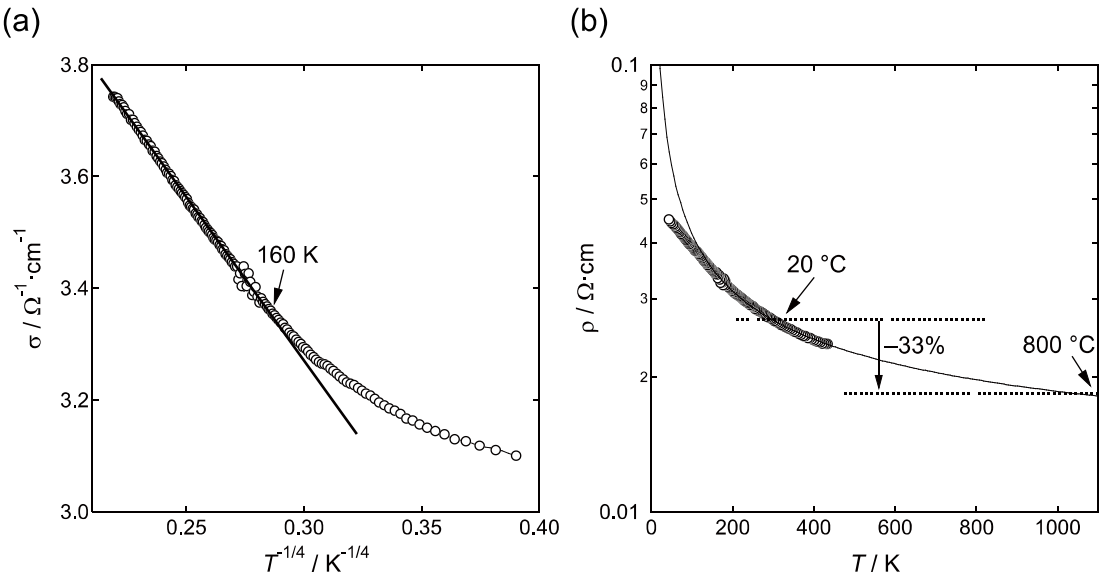

**Figure S2.** (a) Electrical conductivity of the ITO film obtained by the ELAMOD process as a function of  $T^{-1/4}$ . The solid line is fitted by using VRH model. (b) Observed electrical resistivity of the ITO film and fitted curve using obtained parameters in (a).
